# Supplementary material for: Polymer-protein conjugation via a ‘grafting to’ approach – a comparative study of the performance of protein-reactive RAFT chain transfer agents
Source: Royal Society of Chemistry journal article supplement (doi:10.1039/c4py01224k), 2014-10-23

## ELECTRONIC SUPPORTING INFORMATION

### Polymer-protein conjugation via a ‘grafting to’ approach – A comparative study of the performance of protein-reactive RAFT chain transfer agents

N. Vanparijs,<sup>a§</sup> S. Maji,<sup>b§</sup> B. Louage,<sup>a</sup> L. Voorhaar,<sup>b</sup> D. Laplace,<sup>c</sup> Q. Zhang,<sup>2</sup> Y. Shi,<sup>d</sup> W. E. Hennink,<sup>d</sup> R. Hoogenboom,<sup>b\*</sup> B. G. De Geest<sup>a\*</sup>

<sup>a</sup> Department of Pharmaceutics, Ghent University, Ottergemsesteenweg 460, 9000 Ghent, Belgium

<sup>b</sup> Supramolecular Chemistry Group, Department of Organic and Macromolecular Chemistry, Krijgslaan 281 S4, 9000 Ghent, Belgium

<sup>c</sup> Laboratory for Organic Synthesis, Department of Organic Chemistry, Krijgslaan 281 S4-bis, 9000 Ghent, Belgium

<sup>d</sup> Department of Pharmaceutics, Utrecht Institute for Pharmaceutical Sciences, Utrecht University, David de Wiedgebouw, Universiteitsweg 99, 3584 Utrecht, The Netherlands

§ These authors contributed equally to this work.

\* [br.degeest@ugent.be](mailto:br.degeest@ugent.be); [richard.hoogenboom@ugent.be](mailto:richard.hoogenboom@ugent.be)

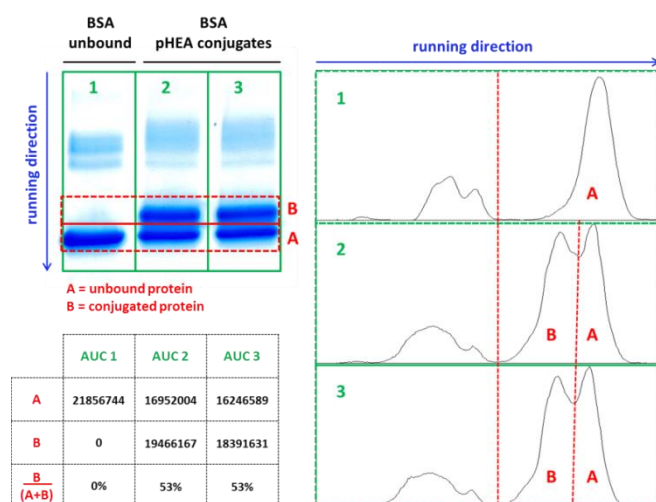

**Figure S1. Quantification of protein conjugation** by automated integration of optical density by ImageJ software and calculating the ratio of conjugated protein (B) to total protein content per lane (A+B). As BSA forms high molecular weight aggregates, these bands were excluded from the calculations. For OVA, aggregation did not occur.

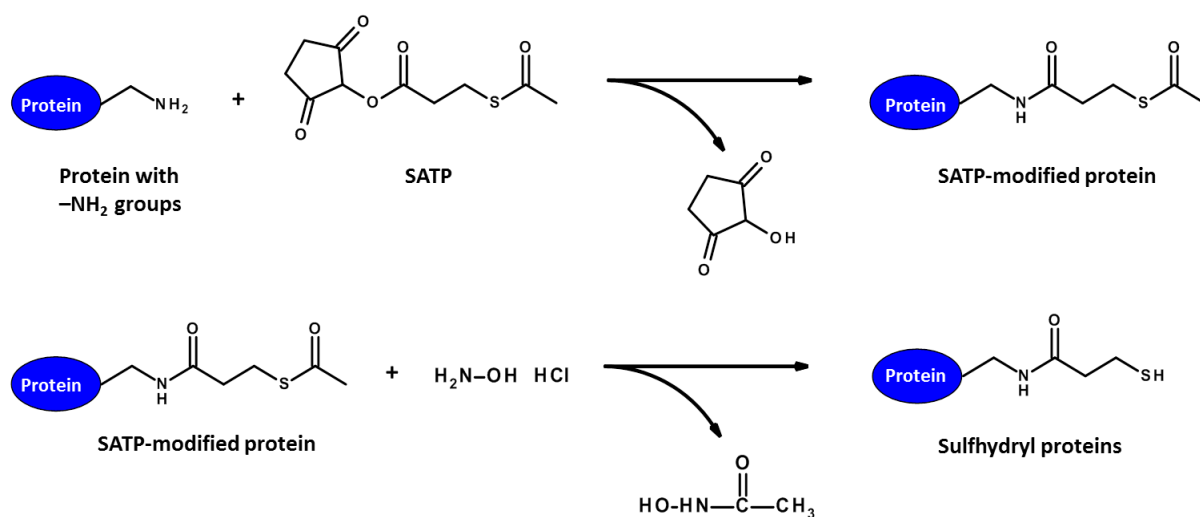

**Scheme S1. Reaction scheme for the modification of protein amino groups with SATP.** First, primary amines on the protein react and form an amide bond with N-succinimidyl-S-acetylthiopropionate (SATP), which contains a protected sulfhydryl. Next, hydroxylamine is used to deacetylate the sulfur and yield a sulfhydryl group.

## $^1\text{H}$ -NMR spectra

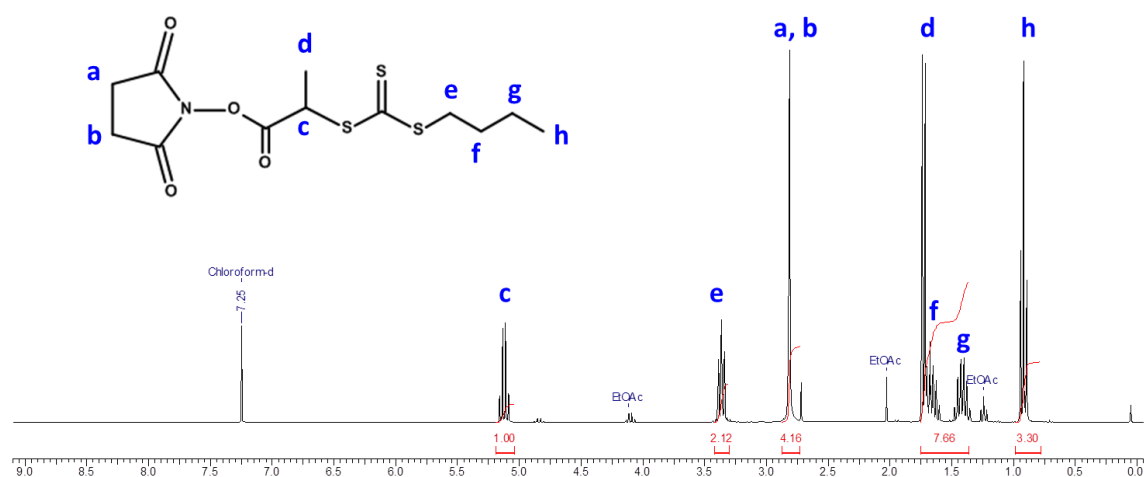

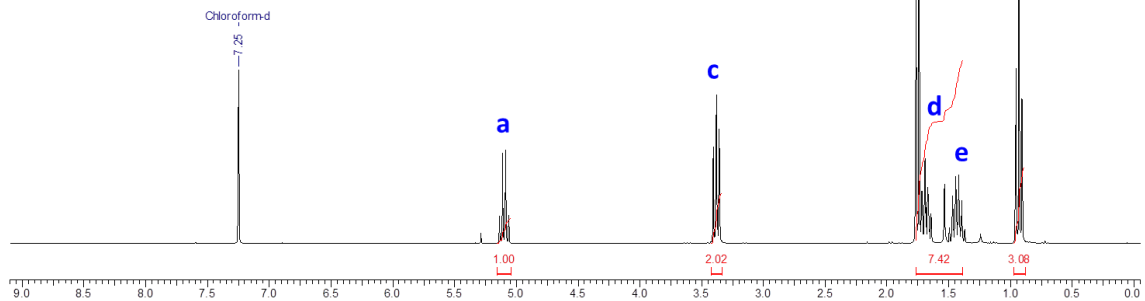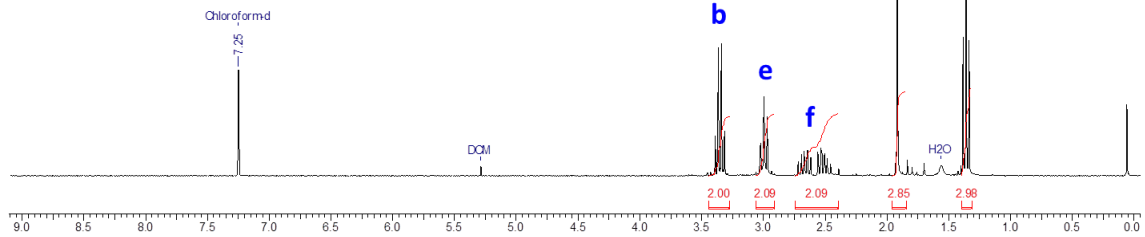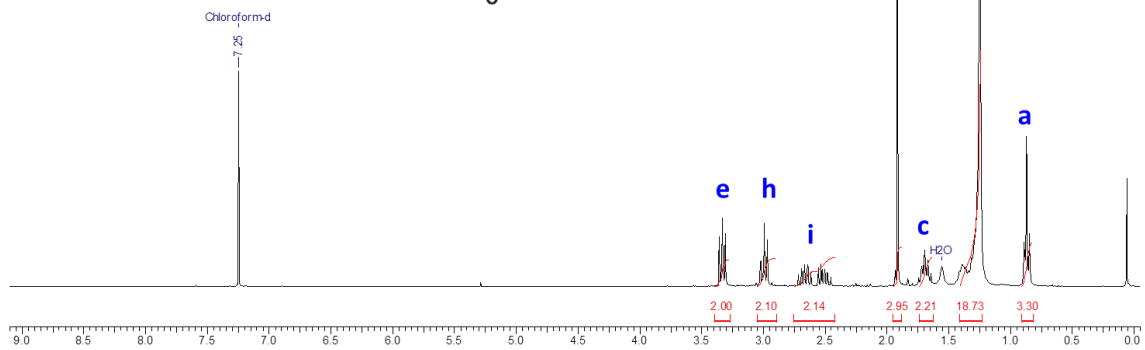

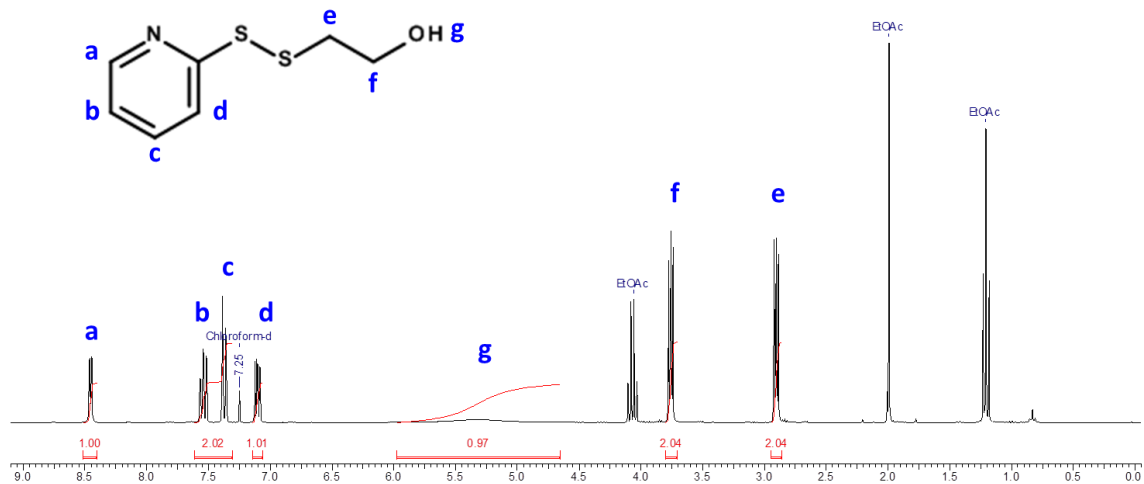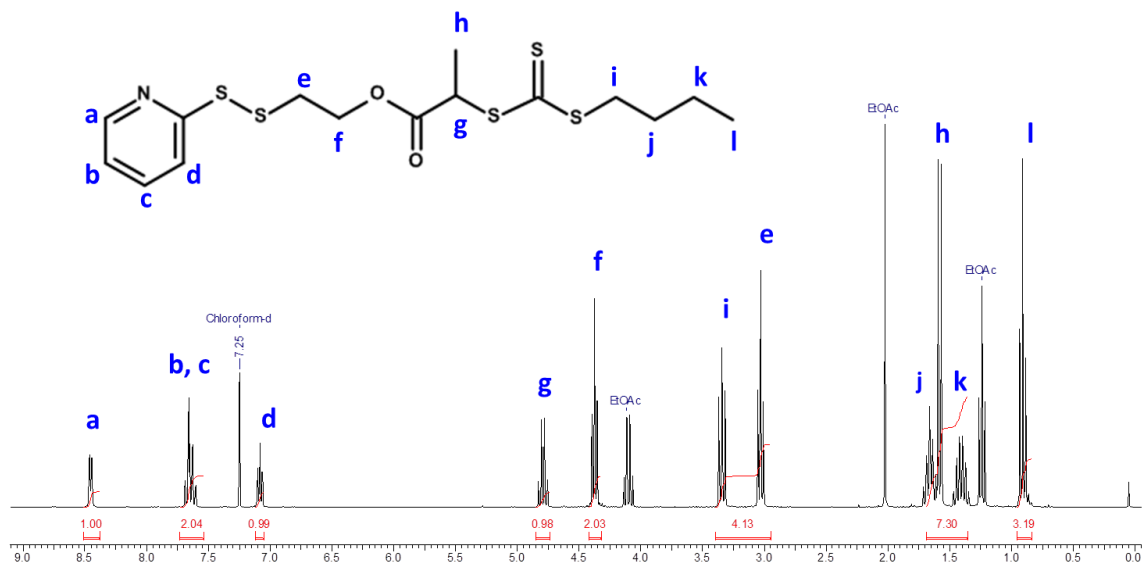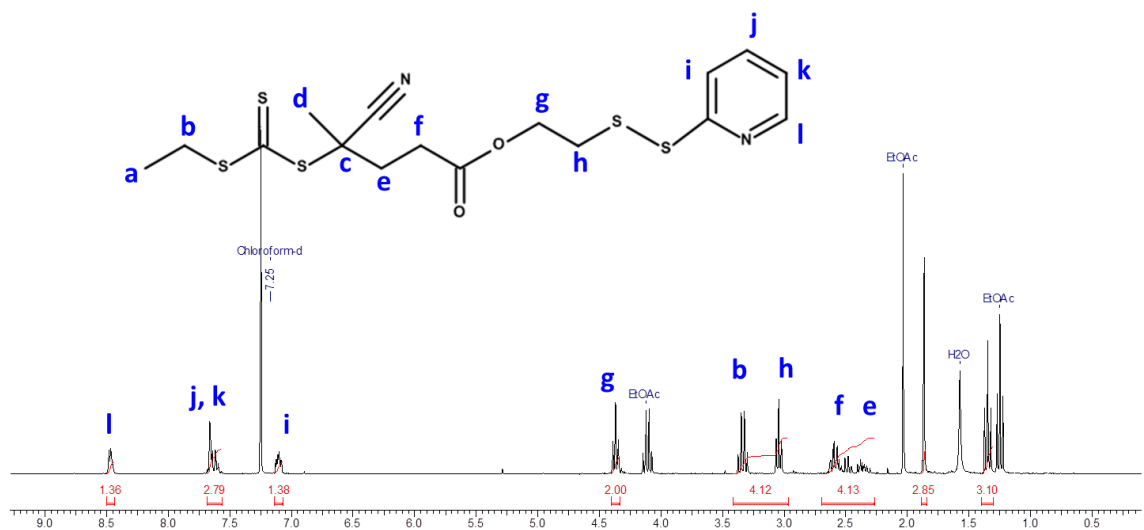

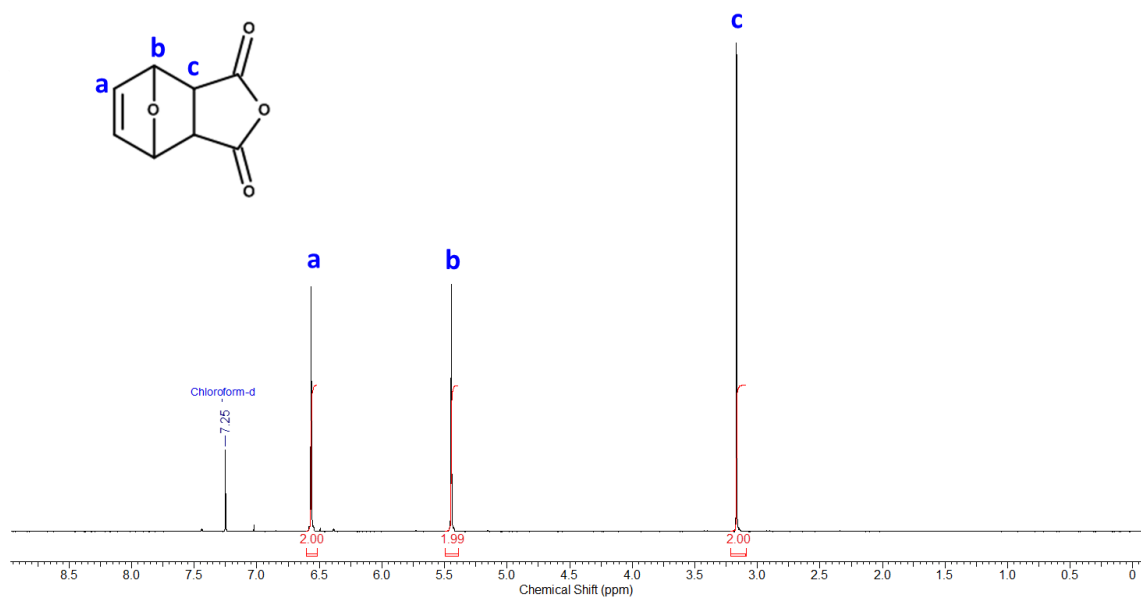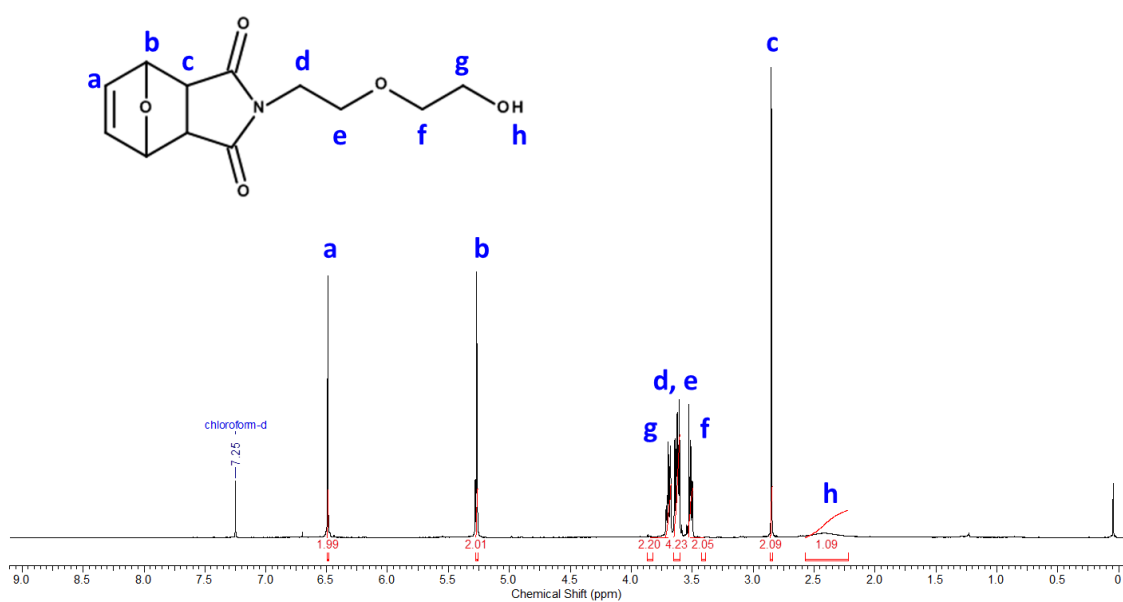

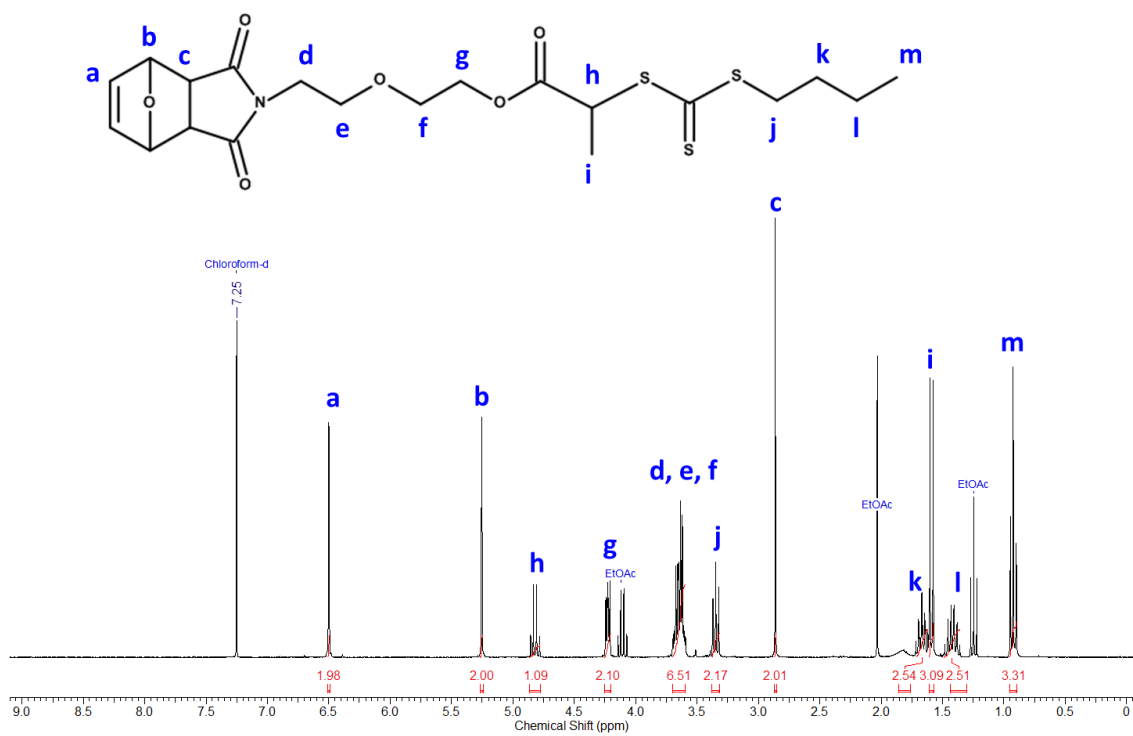

Supplement: c4py01224k1.pdf [file c4py01224k1.pdf]
